# Supplementary material for: Complex germline and somatic mutation processes at a haploid human minisatellite shown by single-molecule analysis
Source: PubMed Central journal article supplement (PMC2599865; doi:10.1016/j.mrfmmm.2008.09.008), 2008-12-15
Supplement: mmc1.pdf [file mmc1.pdf]

**Supplementary Table for Shanks et al., 'Complex germline and somatic mutation processes at a haploid human minisatellite shown by single-molecule analysis'**

| Allele            | Repeat Block |   |    |    |    |   |   | repeat no. | modular structure |
|-------------------|--------------|---|----|----|----|---|---|------------|-------------------|
|                   | 1            | 3 | 1  | 3  | 4  | 3 | 4 |            |                   |
| (1)19 (3)39 (4)16 |              |   | 19 | 39 | 16 |   |   | 74         | 1,3,4             |
| (1)15 (3)41 (4)17 |              |   | 15 | 41 | 17 |   |   | 73         | 1,3,4             |
| (1)16(3)39(4)19   |              |   | 16 | 39 | 19 |   |   | 74         | 1,3,4             |
| (1)17 (3)37 (4)19 |              |   | 17 | 37 | 19 |   |   | 73         | 1,3,4             |
| (1)17 (3)37 (4)21 |              |   | 17 | 37 | 21 |   |   | 75         | 1,3,4             |
| (1)15 (3)39 (4)18 |              |   | 15 | 39 | 18 |   |   | 72         | 1,3,4             |
| (1)16(3)40(4)18   |              |   | 16 | 40 | 18 |   |   | 74         | 1,3,4             |
| (1)15 (3)38 (4)19 |              |   | 15 | 38 | 19 |   |   | 72         | 1,3,4             |
| (1)18(3)35(4)21   |              |   | 18 | 35 | 21 |   |   | 74         | 1,3,4             |
| (1)13 (3)37 (4)19 |              |   | 13 | 37 | 19 |   |   | 57         | 1,3,4             |
| (1)15 (3)30 (4)24 |              |   | 15 | 30 | 24 |   |   | 69         | 1,3,4             |
| (1)15 (3)36 (4)22 |              |   | 15 | 36 | 22 |   |   | 73         | 1,3,4             |
| (1)15 (3)41 (4)15 |              |   | 15 | 41 | 15 |   |   | 71         | 1,3,4             |
| (1)15 (3)44 (4)16 |              |   | 15 | 44 | 16 |   |   | 75         | 1,3,4             |
| (1)16 (3)36 (4)19 |              |   | 16 | 36 | 19 |   |   | 71         | 1,3,4             |
| (1)16 (3)37 (4)20 |              |   | 16 | 37 | 20 |   |   | 73         | 1,3,4             |
| (1)16 (3)37 (4)21 |              |   | 16 | 37 | 21 |   |   | 74         | 1,3,4             |
| (1)16 (3)39 (4)19 |              |   | 16 | 39 | 19 |   |   | 74         | 1,3,4             |
| (1)16 (3)41 (4)15 |              |   | 16 | 41 | 15 |   |   | 72         | 1,3,4             |
| (1)16 (3)41 (4)16 |              |   | 16 | 41 | 16 |   |   | 73         | 1,3,4             |
| (1)16 (3)43 (4)19 |              |   | 16 | 43 | 19 |   |   | 78         | 1,3,4             |
| (1)17 (3)35 (4)21 |              |   | 17 | 35 | 21 |   |   | 73         | 1,3,4             |
| (1)17 (3)35 (4)22 |              |   | 17 | 35 | 22 |   |   | 74         | 1,3,4             |
| (1)17 (3)38 (4)20 |              |   | 17 | 38 | 20 |   |   | 75         | 1,3,4             |
| (1)17 (3)41 (4)19 |              |   | 17 | 41 | 19 |   |   | 77         | 1,3,4             |
| (1)18 (3)44 (4)18 |              |   | 18 | 44 | 18 |   |   | 80         | 1,3,4             |
| (1)23 (3)49 (4)18 |              |   | 23 | 49 | 18 |   |   | 90         | 1,3,4             |
| (1)16(3)40(4)18   |              |   | 16 | 40 | 18 |   |   | 74         | 1,3,4             |
| (1)16(3)41(4)17   |              |   | 16 | 41 | 17 |   |   | 74         | 1,3,4             |
| (1)16 (3)36 (4)21 |              |   | 16 | 36 | 21 |   |   | 73         | 1,3,4             |
| (1)16 (3)41 (4)18 |              |   | 16 | 41 | 18 |   |   | 75         | 1,3,4             |
| (1)17 (3)41 (4)16 |              |   | 17 | 41 | 16 |   |   | 74         | 1,3,4             |
| (1)17(3)34(4)20   |              |   | 17 | 34 | 20 |   |   | 73         | 1,3,4             |
| (1)14 (3)39 (4)20 |              |   | 14 | 39 | 20 |   |   | 73         | 1,3,4             |
| (1)17 (3)40 (4)17 |              |   | 17 | 40 | 17 |   |   | 74         | 1,3,4             |
| (1)17(3)38(4)20   |              |   | 17 | 38 | 20 |   |   | 75         | 1,3,4             |
| (1)15 (3)36 (4)21 |              |   | 15 | 36 | 21 |   |   | 72         | 1,3,4             |
| (1)17 (3)37 (4)22 |              |   | 17 | 37 | 22 |   |   | 76         | 1,3,4             |
| (1)16 (3)41 (4)20 |              |   | 16 | 41 | 20 |   |   | 77         | 1,3,4             |
| (1)16 (3)35 (4)21 |              |   | 16 | 35 | 21 |   |   | 72         | 1,3,4             |
| (1)16 (3)33 (4)23 |              |   | 16 | 33 | 23 |   |   | 72         | 1,3,4             |
| (1)15 (3)36 (4)20 |              |   | 15 | 36 | 20 |   |   | 71         | 1,3,4             |
| (1)14 (3)42 (?)19 |              |   | 14 | 42 | 19 |   |   | 75         | 1,3,4             |
| (1)16 (3)36 (4)21 |              |   | 16 | 36 | 21 |   |   | 73         | 1,3,4             |
| (1)16 (3)39 (4)17 |              |   | 16 | 39 | 17 |   |   | 72         | 1,3,4             |
| (1)14 (3)46 (4)14 |              |   | 14 | 46 | 14 |   |   | 74         | 1,3,4             |
| (1)16 (3)37 (4)19 |              |   | 16 | 37 | 19 |   |   | 72         | 1,3,4             |
| (1)17 (3)38 (4)19 |              |   | 17 | 38 | 19 |   |   | 74         | 1,3,4             |
| (1)16 (3)39 (4)15 |              |   | 16 | 39 | 15 |   |   | 70         | 1,3,4             |
| (1)15 (3)42 (4)17 |              |   | 15 | 42 | 17 |   |   | 74         | 1,3,4             |
| (1)15 (3)42 (4)18 |              |   | 15 | 42 | 18 |   |   | 75         | 1,3,4             |
| (1)15 (3)37 (4)20 |              |   | 15 | 37 | 20 |   |   | 72         | 1,3,4             |
| (1)15 (3)39 (4)19 |              |   | 15 | 39 | 19 |   |   | 72         | 1,3,4             |
| (1)15 (3)39 (4)19 |              |   | 15 | 39 | 19 |   |   | 73         | 1,3,4             |
| (1)15 (3)39 (4)19 |              |   | 15 | 39 | 19 |   |   | 73         | 1,3,4             |

| Allele            | Repeat Block |    |    |   |   |   | repeat | modular structure |       |
|-------------------|--------------|----|----|---|---|---|--------|-------------------|-------|
|                   | 1            | 3  | 1  | 3 | 4 | 3 | 4      |                   | no.   |
| (1)15 (3)40 (4)16 | 15           | 40 | 16 |   |   |   |        | 71                | 1,3,4 |
| (1)15 (3)41 (4)14 | 15           | 41 | 14 |   |   |   |        | 70                | 1,3,4 |
| (1)15 (3)41 (4)14 | 15           | 41 | 14 |   |   |   |        | 70                | 1,3,4 |
| (1)15 (3)41 (4)15 | 15           | 41 | 15 |   |   |   |        | 71                | 1,3,4 |
| (1)15 (3)41 (4)15 | 15           | 41 | 15 |   |   |   |        | 71                | 1,3,4 |
| (1)15 (3)41 (4)15 | 15           | 41 | 15 |   |   |   |        | 71                | 1,3,4 |
| (1)15 (3)41 (4)18 | 15           | 41 | 18 |   |   |   |        | 74                | 1,3,4 |
| (1)15 (3)41 (4)20 | 15           | 41 | 20 |   |   |   |        | 76                | 1,3,4 |
| (1)15 (3)41 (4)23 | 15           | 41 | 23 |   |   |   |        | 79                | 1,3,4 |
| (1)15 (3)41 (4)23 | 15           | 41 | 23 |   |   |   |        | 79                | 1,3,4 |
| (1)15 (3)42 (4)15 | 15           | 42 | 15 |   |   |   |        | 72                | 1,3,4 |
| (1)15 (3)42 (4)15 | 15           | 42 | 15 |   |   |   |        | 72                | 1,3,4 |
| (1)15 (3)42 (4)16 | 15           | 42 | 16 |   |   |   |        | 73                | 1,3,4 |
| (1)15 (3)42 (4)16 | 15           | 42 | 16 |   |   |   |        | 73                | 1,3,4 |
| (1)15 (3)42 (4)16 | 15           | 42 | 16 |   |   |   |        | 73                | 1,3,4 |
| (1)15 (3)42 (4)16 | 15           | 42 | 16 |   |   |   |        | 73                | 1,3,4 |
| (1)15 (3)42 (4)17 | 15           | 42 | 17 |   |   |   |        | 74                | 1,3,4 |
| (1)15 (3)42 (4)18 | 15           | 42 | 18 |   |   |   |        | 75                | 1,3,4 |
| (1)15 (3)42 (4)18 | 15           | 42 | 18 |   |   |   |        | 75                | 1,3,4 |
| (1)16 (3)36 (4)20 | 16           | 36 | 20 |   |   |   |        | 72                | 1,3,4 |
| (1)16 (3)37 (4)21 | 16           | 37 | 21 |   |   |   |        | 74                | 1,3,4 |
| (1)16 (3)38 (4)21 | 16           | 38 | 21 |   |   |   |        | 75                | 1,3,4 |
| (1)16 (3)39 (4)15 | 16           | 39 | 15 |   |   |   |        | 70                | 1,3,4 |
| (1)16 (3)39 (4)20 | 16           | 39 | 20 |   |   |   |        | 75                | 1,3,4 |
| (1)16 (3)40 (4)16 | 16           | 40 | 16 |   |   |   |        | 72                | 1,3,4 |
| (1)16 (3)40 (4)18 | 16           | 40 | 18 |   |   |   |        | 74                | 1,3,4 |
| (1)16 (3)44 (4)16 | 16           | 44 | 16 |   |   |   |        | 76                | 1,3,4 |
| (1)16 (3)46 (4)13 | 16           | 46 | 13 |   |   |   |        | 75                | 1,3,4 |
| (1)18 (3)38 (4)18 | 18           | 38 | 18 |   |   |   |        | 74                | 1,3,4 |
| (1)18 (3)38 (4)18 | 18           | 38 | 18 |   |   |   |        | 74                | 1,3,4 |
| (1)16 (3)40 (4)17 | 16           | 40 | 17 |   |   |   |        | 73                | 1,3,4 |
| (1)16 (3)40 (4)18 | 16           | 40 | 18 |   |   |   |        | 74                | 1,3,4 |
| (1)16 (3)37 (4)18 | 16           | 37 | 18 |   |   |   |        | 71                | 1,3,4 |
| (1)16 (3)37 (4)19 | 16           | 37 | 19 |   |   |   |        | 72                | 1,3,4 |
| (1)16 (3)38 (4)20 | 16           | 38 | 20 |   |   |   |        | 74                | 1,3,4 |
| (1)12 (3)44 (4)19 | 12           | 44 | 19 |   |   |   |        | 75                | 1,3,4 |
| (1)16 (3)37 (4)19 | 16           | 37 | 19 |   |   |   |        | 72                | 1,3,4 |
| (1)15 (3)37 (4)20 | 15           | 37 | 20 |   |   |   |        | 72                | 1,3,4 |
| (1)16 (3)39 (4)20 | 16           | 39 | 20 |   |   |   |        | 75                | 1,3,4 |
| (1)16 (3)38 (4)20 | 16           | 38 | 20 |   |   |   |        | 74                | 1,3,4 |
| (1)17 (3)37 (4)15 | 17           | 37 | 15 |   |   |   |        | 69                | 1,3,4 |
| (1)16 (3)40 (4)18 | 16           | 40 | 18 |   |   |   |        | 74                | 1,3,4 |
| (1)15 (3)36 (4)21 | 15           | 36 | 21 |   |   |   |        | 72                | 1,3,4 |
| (1)17 (3)37 (4)19 | 17           | 37 | 19 |   |   |   |        | 73                | 1,3,4 |
| (1)16 (3)37 (4)18 | 16           | 37 | 18 |   |   |   |        | 71                | 1,3,4 |
| (1)17 (3)37 (4)20 | 17           | 37 | 20 |   |   |   |        | 74                | 1,3,4 |
| (1)16 (3)41 (4)18 | 16           | 41 | 18 |   |   |   |        | 75                | 1,3,4 |
| (1)12 (3)46 (4)17 | 12           | 46 | 17 |   |   |   |        | 75                | 1,3,4 |
| (1)16 (3)38 (4)20 | 16           | 38 | 20 |   |   |   |        | 74                | 1,3,4 |
| (1)15 (3)37 (4)21 | 15           | 37 | 21 |   |   |   |        | 73                | 1,3,4 |
| (1)15 (3)39 (4)19 | 15           | 39 | 19 |   |   |   |        | 73                | 1,3,4 |
| (1)15 (3)40 (4)19 | 15           | 40 | 19 |   |   |   |        | 74                | 1,3,4 |
| (1)16 (3)34 (4)22 | 16           | 34 | 22 |   |   |   |        | 72                | 1,3,4 |
| (1)16 (3)34 (4)22 | 16           | 34 | 22 |   |   |   |        | 72                | 1,3,4 |
| (1)16 (3)38 (4)21 | 16           | 38 | 21 |   |   |   |        | 75                | 1,3,4 |
| (1)17 (3)38 (4)19 | 17           | 38 | 19 |   |   |   |        | 74                | 1,3,4 |
| (1)15 (3)40 (4)19 | 15           | 40 | 19 |   |   |   |        | 74                | 1,3,4 |
| (1)16 (3)41 (4)18 | 16           | 41 | 18 |   |   |   |        | 75                | 1,3,4 |
| (1)15 (3)38 (4)20 | 15           | 38 | 20 |   |   |   |        | 73                | 1,3,4 |
| (1)16 (3)39 (4)18 | 16           | 39 | 18 |   |   |   |        | 73                | 1,3,4 |
| (1)16 (3)40 (4)19 | 16           | 40 | 19 |   |   |   |        | 75                | 1,3,4 |
| (1)16 (3)40 (4)18 | 16           | 40 | 18 |   |   |   |        | 74                | 1,3,4 |

| Allele                                | Repeat Block |          |          |          |          |          | repeat   | modular structure |          |           |               |
|---------------------------------------|--------------|----------|----------|----------|----------|----------|----------|-------------------|----------|-----------|---------------|
|                                       | 1            | 3        | 1        | 3        | 4        | 3        | 4        |                   | no.      |           |               |
| (1)14 (3)39 (4)19                     |              |          | 14       | 39       | 19       |          |          |                   | 72       | 1,3,4     |               |
| (1)16 (3)41 (4)17                     |              |          | 16       | 41       | 17       |          |          |                   | 74       | 1,3,4     |               |
| (1)16 (3)38 (4)19                     |              |          | 16       | 38       | 19       |          |          |                   | 73       | 1,3,4     |               |
| (1)16 (3)38 (4)19                     |              |          | 16       | 38       | 19       |          |          |                   | 73       | 1,3,4     |               |
| (1)17 (3)37 (4)19                     |              |          | 17       | 37       | 19       |          |          |                   | 73       | 1,3,4     |               |
| (1)15 (3)39 (4)18                     |              |          | 15       | 39       | 18       |          |          |                   | 72       | 1,3,4     |               |
| (1)16 (3)41 (4)16                     |              |          | 16       | 41       | 16       |          |          |                   | 73       | 1,3,4     |               |
| (1)16 (3)39 (4)19                     |              |          | 16       | 39       | 19       |          |          |                   | 74       | 1,3,4     |               |
| (1)16 (3)38 (4)19                     |              |          | 16       | 38       | 19       |          |          |                   | 73       | 1,3,4     |               |
| (1)16 (3)38 (4)19                     |              |          | 16       | 38       | 19       |          |          |                   | 73       | 1,3,4     |               |
| (1)16 (3)38 (4)18                     |              |          | 16       | 38       | 18       |          |          |                   | 72       | 1,3,4     |               |
| (1)16 (3)41 (4)15                     |              |          | 16       | 41       | 15       |          |          |                   | 72       | 1,3,4     |               |
| (1)16 (3)38 (4)18                     |              |          | 16       | 38       | 18       |          |          |                   | 72       | 1,3,4     |               |
| (1)16 (3)38 (4)18                     |              |          | 16       | 38       | 18       |          |          |                   | 72       | 1,3,4     |               |
| (1)16 (3)38 (4)17                     |              |          | 16       | 38       | 17       |          |          |                   | 71       | 1,3,4     |               |
| (1)16 (3)38 (4)19                     |              |          | 16       | 38       | 19       |          |          |                   | 73       | 1,3,4     |               |
| (1)17 (3)38 (4)14                     |              |          | 17       | 38       | 14       |          |          |                   | 69       | 1,3,4     |               |
| (1)16 (3)38 (4)17                     |              |          | 16       | 38       | 17       |          |          |                   | 71       | 1,3,4     |               |
| (1)18 (3)39 (4)19                     |              |          | 18       | 39       | 19       |          |          |                   | 76       | 1,3,4     |               |
| (1)16 (3)44 (4)14                     |              |          | 16       | 44       | 14       |          |          |                   | 74       | 1,3,4     |               |
| (1)16 (3)44 (4)16                     |              |          | 16       | 44       | 16       |          |          |                   | 76       | 1,3,4     |               |
| (1)16 (3)38 (4)19                     |              |          | 16       | 38       | 19       |          |          |                   | 73       | 1,3,4     |               |
| (1)16 (3)38 (4)19                     |              |          | 16       | 38       | 19       |          |          |                   | 73       | 1,3,4     |               |
| (1)16 (3)41 (4)16                     |              |          | 16       | 41       | 16       |          |          |                   | 73       | 1,3,4     |               |
| (1)17 (3)37 (4)19                     |              |          | 17       | 37       | 19       |          |          |                   | 73       | 1,3,4     |               |
| (1)16 (3)39 (4)18                     |              |          | 16       | 39       | 18       |          |          |                   | 73       | 1,3,4     |               |
| (1)18 (3)38 (4)17                     |              |          | 18       | 38       | 17       |          |          |                   | 73       | 1,3,4     |               |
| (1)14 (3)38 (4)18                     |              |          | 14       | 38       | 18       |          |          |                   | 70       | 1,3,4     |               |
| (1)17 (3)38 (4)1 (3)3 (4)16           |              |          | 17       | 38       | 1        | 3        | 16       |                   | 75       | 1,3,4,3,4 |               |
| (1)17 (3)35 (4)2 (3)1 (4)22           |              |          | 17       | 35       | 2        | 1        | 22       |                   | 77       | 1,3,4,3,4 |               |
| (1)16 (3)39 (4)1 (3)1 (4)19           |              |          | 16       | 39       | 1        | 1        | 19       |                   | 76       | 1,3,4,3,4 |               |
| (1)19 (3)35 (4)1 (3)1 (4)16           |              |          | 19       | 35       | 1        | 1        | 16       |                   | 72       | 1,3,4,3,4 |               |
| (1)15 (3)38 (4)2 (3)1 (4)15           |              |          | 15       | 38       | 2        | 1        | 15       |                   | 71       | 1,3,4,3,4 |               |
| (1)16 (3)37 (4)3 (3)2 (4)2 (3)2 (4)12 |              |          | 16       | 37       | 3        | 2        | 2        | 2                 | 12       | 74        | 1,3,4,3,4,3,4 |
| (1)16 (3)38 (4)3 (3)2 (4)2 (3)2 (4)12 |              |          | 16       | 37       | 3        | 2        | 2        | 2                 | 12       | 75        | 1,3,4,3,4,3,4 |
| (1)16 (3)38 (4)3 (3)2 (4)2 (3)2 (4)12 |              |          | 16       | 38       | 3        | 2        | 2        | 2                 | 12       | 75        | 1,3,4,3,4,3,4 |
| (1)16 (3)38 (4)3 (3)2 (4)2 (3)3 (4)11 |              |          | 16       | 38       | 3        | 2        | 2        | 3                 | 11       | 75        | 1,3,4,3,4,3,4 |
| (1)17 (3)38 (4)1 (3)3 (4)1 (3)4 (4)10 |              |          | 17       | 38       | 1        | 3        | 1        | 4                 | 10       | 74        | 1,3,4,3,4,3,4 |
| (1)16 (3)39 (4)1 (3)3 (4)2 (3)2 (4)12 |              |          | 16       | 39       | 1        | 3        | 2        | 2                 | 12       | 75        | 1,3,4,3,4,3,4 |
| (1)18 (3)5 (1/0)1 (3)37 (4)21         | 18           | 5        | 1        | 37       | 21       |          |          |                   |          | 82        | 1,3,1,3,4     |
| (1)18 (3)8 (1)1 (3)36 (4)20           | 18           | 8        | 1        | 36       | 20       |          |          |                   |          | 83        | 1,3,1,3,4     |
| (1)16 (3)2 (1)1 (3)40 (4)1 (3)2 (4)15 | 16           | 2        | 1        | 40       | 1        | 2        | 15       |                   |          | 77        | 1,3,1,3,4,3,4 |
|                                       | <b>1</b>     | <b>3</b> | <b>1</b> | <b>3</b> | <b>4</b> | <b>3</b> | <b>4</b> | <b>3</b>          | <b>4</b> |           |               |
